1 **Nonsteroidal anti-inflammatory drugs alter the microbiota and exacerbate**  
2 ***Clostridium difficile* colitis while dysregulating the inflammatory response.**

3

4 Damian Maseda<sup>a#</sup>, Joseph P. Zackular<sup>a#</sup>, Bruno Trindade<sup>b</sup>, Leslie Kirk<sup>b</sup>, Leslie J. Crofford<sup>b</sup>,  
5 Patrick D. Schloss<sup>c</sup>, Jennifer Lising Roxas<sup>d</sup>, V.K. Viswanathan<sup>d</sup>, Gayatri Vedantam<sup>d</sup>, Lisa M.  
6 Rogers<sup>b</sup>, Mary K. Washington<sup>a</sup>, Eric P. Skaar<sup>a</sup>, David M. Aronoff<sup>a,b, †</sup>

7

8 <sup>a</sup>Department of Pathology, Microbiology, and Immunology, Vanderbilt University School of  
9 Medicine, Nashville, Tennessee, United States

10 <sup>b</sup>Department of Medicine, Vanderbilt University School of Medicine, Nashville, Tennessee,  
11 United States

12 <sup>c</sup>Department of Microbiology and Immunology, University of Michigan, Ann Arbor, Michigan,  
13 United States

14 <sup>d</sup>School of Animal and Comparative Biomedical Sciences, University of Arizona, Tucson,  
15 Arizona, United States

16 <sup>e</sup>Department of Pathology, the University of Massachusetts Medical School, Worcester,  
17 Massachusetts, USA

18 <sup>#</sup>contributed equally

19

20 <sup>†</sup>Corresponding author:

21 David M. Aronoff, MD, email: [d.aronoff@vanderbilt.edu](mailto:d.aronoff@vanderbilt.edu)

22

23 Abstract Word count = 143

24 Text word count = 5339

25 **Abstract**

26 *Clostridium difficile* infection (CDI) is a major public health threat worldwide. The use of  
27 nonsteroidal anti-inflammatory drugs (NSAIDs) is associated with enhanced susceptibility to and  
28 severity of nosocomial CDI; however, the mechanisms driving this phenomenon have not been  
29 elucidated. NSAIDs alter prostaglandin (PG) metabolism by inhibiting cyclooxygenase (COX)  
30 enzymes. Here, we found that treatment with the NSAID indomethacin prior to infection altered  
31 the microbiota and dramatically increased mortality and intestinal pathology associated with CDI  
32 in mice. We demonstrate that in *C. difficile*-infected animals, indomethacin lead to PG  
33 deregulation, an altered proinflammatory transcriptional and protein profile, and perturbed  
34 epithelial cell junctions. These effects were paralleled by an increased recruitment of intestinal  
35 neutrophils and CD4<sup>+</sup> cells. Together, these data implicate NSAIDs in perturbation of the gut  
36 microbiota and disruption of protective COX-mediated PG production during CDI, resulting in  
37 altered epithelial integrity and associated immune responses.

38 *Clostridium difficile* is the most commonly reported nosocomial pathogen in the United  
39 States and an urgent public health threat worldwide(1). *C. difficile* infection (CDI) manifests as a  
40 spectrum of gastrointestinal disorders ranging from mild-diarrhea to toxic megacolon and/or  
41 death, particularly in older adults(2). The primary risk factor for CDI is antibiotic treatment, which  
42 perturbs the resident gut microbiota and abolishes colonization resistance(3). However, factors  
43 other than antibiotic exposure increase the risk for CDI and cases not associated with the use of  
44 antimicrobials have been on the rise(4). Defining mechanisms whereby non-antibiotic factors  
45 impact CDI pathogenesis promises to reveal actionable targets for preventing or treating this  
46 infection.

47 Recently, several previously unappreciated immune system, host, microbiota, and  
48 dietary factors have emerged as modulators of CDI severity and risk. The food additive  
49 trehalose, for example, was recently shown to increase *C. difficile* virulence in mice and the  
50 widespread adoption of trehalose in food products was implicated in the emergence of  
51 hypervirulent strains of *C. difficile*(5). Similarly, excess dietary zinc has a profound impact on  
52 severity of *C. difficile* disease in mice, and high levels of zinc alter the gut microbiota and  
53 increase susceptibility to CDI(6). Importantly, there has been a growing body of evidence for the  
54 essential role of the innate immune response and inflammation in both protection against and  
55 pathology of CDI(7–9). Mounting a proper and robust inflammatory response is critical for  
56 successful clearance of *C. difficile*, and the immune response can be a key predictor of  
57 prognosis(3, 10). In this context, specific immune mediators can facilitate both protective and  
58 pathogenic responses through molecules like IL-23 and IL-22, and an excessive and  
59 dysregulated immune response is believed to be one of the main factors behind post-infection  
60 complications.

61 Epidemiological data have established an association between the use of nonsteroidal  
62 anti-inflammatory drugs (NSAIDs) and CDI(11). Muñoz-Miralles and colleagues demonstrated  
63 that the NSAID indomethacin significantly increased the severity of CDI in antibiotic-treated

64 mice when the NSAID was applied following inoculation and throughout the infection (Muñoz-  
65 Miralles *et al.*, in press, *Future Microbiology*, 2018), and indomethacin exposure is associated  
66 with alterations in the structure of the intestinal microbiota(12, 13). NSAIDs are among the most  
67 highly prescribed and most widely consumed drugs in the United States(14), particularly among  
68 older adults(15) and have been implicated in causing spontaneous colitis in humans(16, 17).  
69 They act by inhibiting cyclooxygenase (COX) enzymatic activity, which prevents the generation  
70 of prostaglandins (PGs) and alters the outcome of subsequent inflammatory events.  
71 Prostaglandins, and among those especially PGE<sub>2</sub>, are important lipid mediators that are highly  
72 abundant at sites of inflammation and infection, and support gastrointestinal homeostasis and  
73 epithelial cell health (18). NSAID use has been associated with shifts in the gut microbiota, both  
74 in rodents and humans(19–22), but these shifts have not been explored in the context of CDI.

75 In this report, we deployed a mouse model of antibiotic-associated CDI to examine the  
76 impact of exposure to indomethacin prior to infection with *C. difficile* on disease severity,  
77 immune response, intestinal epithelial integrity, and the gut microbiota. These investigations  
78 revealed that even a brief exposure to an NSAID prior to *C. difficile* inoculation dramatically  
79 increases CDI severity, reduces survival, and increases pathological evidence of disease.  
80 Inhibition of PG biosynthesis by indomethacin altered the cytokine response and immune cell  
81 recruitment following CDI, enhancing intestinal tissue histopathology and allowing a partial  
82 systemic bacterial dissemination by dismantling intestinal epithelial tight junctions. Additionally,  
83 indomethacin treatment alone significantly perturbed the structure of the gut microbiota. These  
84 findings support epidemiological data linking NSAID use and CDI, and caution against the  
85 overuse of NSAIDs in patients at high risk for *C. difficile*, such as older adults.

## 86 **Results**

### 87 ***Indomethacin worsens C. difficile infection in mice and increases mortality***

88 To determine the extent to which pre-exposure to NSAIDs influences the natural course  
89 of CDI, mice were treated with indomethacin for two days prior to inoculation with *C. difficile*  
90 (Fig. 1A). We infected C57BL/6 female mice with  $1 \times 10^4$  spores of the *C. difficile* NAP1/BI/027  
91 strain M7404 following 5 days of pre-treatment with the broad-spectrum antibiotic, cefoperazone  
92 (Fig. 1A). This brief indomethacin treatment prior to CDI dramatically decreased cecum size,  
93 increased mortality rate from 20% to 80% (Fig. 1C) but did not significantly impact weight loss  
94 (Fig. 1D). Mice pre-treated with indomethacin and infected with *C. difficile* also displayed more  
95 severe histopathological evidence of cecal tissue damage compared to mice infected with *C.*  
96 *difficile* that were not exposed to the drug (Fig. 1E). Indomethacin-exposed and infected mice  
97 exhibited no change in the burden of *C. difficile* in the cecum (Fig. 1F), but their livers harbored  
98 significantly greater loads of mixed aerobic and anaerobic bacteria (Fig. 1G), suggesting that  
99 indomethacin pre-treatment compromised intestinal barrier function during CDI and fostered  
100 microbiota translocation to the liver.

101

### 102 ***Indomethacin alters the proportion of neutrophils and CD4<sup>+</sup> T cells in mucosal-*** 103 ***associated tissues during C. difficile infection***

104 The mucosal immune response is an important factor in the clearance of and the  
105 pathology associated with CDI(10, 23–26). NSAIDs can disturb immune homeostasis within the  
106 gastrointestinal mucosa(27) and have been used to trigger immune-mediated colitis in mice(28).  
107 We determined the extent to which indomethacin altered immune cell populations in and around  
108 the gastrointestinal tract during CDI. Mice were euthanized by day 3 after infection and cells  
109 from the peritoneal cavity, mesenteric lymph nodes (mLN) and colonic lamina propria (cLP)  
110 were processed for flow cytometry analysis. CDI provoked an increase of neutrophil and CD4<sup>+</sup> T  
111 cell numbers across all three compartments (Fig. 2). Focusing on the differences caused by

112 indomethacin exposure prior to CDI, we found that neutrophils were significantly increased in  
113 the peritoneal cavity compared to CDI alone. This was paralleled by a similar overall trend in the  
114 mLN and colonic lamina propria (Fig. 2B). On the other hand, CD4<sup>+</sup> T cells were slightly  
115 decreased in the mLN, but their numbers increased in the cLP (Fig. 2C), potentially due to a  
116 selective migration and/or proliferation in inflamed sites. Considering that IL-17 has been  
117 implicated in driving the neutrophilic inflammatory response to CDI (Nakagawa et al., 2016) and  
118 that Th17 cells and ILC3 cells are major sources of IL-17 during inflammatory responses, we  
119 evaluated the combined impact of indomethacin and CDI on these populations. Interestingly,  
120 larger numbers of CD4<sup>+</sup>ROR $\gamma$ t<sup>+</sup> (Th17) cells were found in the cLP, but not in the mLN (Fig. 2D).  
121 CDI also induced an expansion of ILC type 3 cell numbers in the cLP, but without significant  
122 alterations due to indomethacin pre-treatment (Fig. 2E). These data demonstrate that  
123 indomethacin pre-treatment exacerbates neutrophilic and Th17-type immune responses to CDI  
124 in the mouse.

125

126 ***Indomethacin dysregulates the expression of genes involved in prostaglandin***  
127 ***metabolism and inflammatory peptides during CDI***

128 CDI induces extensive transcriptional changes in the intestines that generally result in  
129 protective responses that restrain bacterial spread and mitigate induced intestinal epithelial  
130 pathology(3, 29). To examine the impact of indomethacin on this response, we interrogated  
131 transcriptional changes related to inflammatory responses in the cecum following indomethacin  
132 pre-treatment followed by CDI. We noted significant alterations, both positive and negative, in  
133 the inflammatory gene transcriptome of the cecum in mice infected with *C. difficile* following brief  
134 indomethacin exposure compared with *C. difficile*-inoculated mice that were not treated with the  
135 NSAID (Fig. 3B-3D). Notably, indomethacin pre-treatment followed by CDI significantly  
136 upregulated several genes involved in innate immune cell activation and recruitment like *Il1b*,  
137 *Cxcl3*, *Csf3*, *Cxcl1*, while it downregulated *Cd4*, *Tlr5* and *Tgfb2* (Fig. 3.C and D).

138 To further characterize the impact of NSAIDs on the immune response during CDI, we  
139 explored the impact of indomethacin on intrinsic mechanisms of host defense in the  
140 gastrointestinal tract. Specifically, we focused on the Gram-positive selective antimicrobial  
141 peptide, REG3 $\gamma$ , and mucin; two host intestinal defense factors that have been shown to be  
142 important for the control of gastrointestinal infections(30). We confirmed by qRT-PCR that CDI  
143 upregulated *Reg3g* transcription, while *Muc2* transcript levels were not significantly altered  
144 following indomethacin treatment (Fig.3E). To evaluate if PGE<sub>2</sub> synthesis and signaling were  
145 altered due to infection or indomethacin treatment, we analyzed the expression of genes  
146 encoding PGE<sub>2</sub> receptors and the enzymes involved in PGE<sub>2</sub> metabolism. The transcription of  
147 the PGE<sub>2</sub> receptor gene *Ptger4* was severely suppressed upon CDI, but indomethacin did not  
148 significantly exacerbate this suppression (Fig. 3F). Infection *C. difficile* suppressed colonic  
149 expression of the COX-1 and COX-2 encoding genes *Ptgs1* and *Ptgs2*, respectively (Fig. 3G).  
150 Notably, indomethacin pre-treatment prevented this down-modulation and simultaneously  
151 induced the expression of the *Ptges* gene, which encodes a major synthase for PGE<sub>2</sub> (Fig. 3G).  
152 What is more, indomethacin further reduced expression of the PGE<sub>2</sub> inactivating enzyme 15-  
153 hydroxyprostaglandin dehydrogenase (*Hpgd* gene; Fig. 3G). This selective inhibition of *Ptgs1*  
154 and *Ptgs2* transcription, together with inhibition of *Hpgd* and enhanced *Ptges* are consistent with  
155 the paradoxical *increase* in PGE<sub>2</sub> concentrations observed 72 hours following infection (Fig. S1).  
156 Together, these data demonstrate that indomethacin pre-treatment increases innate immune  
157 cell activation and recruitment, while also leading to PG dysregulation.

158

159 ***Indomethacin increases intestinal inflammation by upregulating a combined myeloid-***  
160 ***recruitment and response in the cecum***

161 Following the observation that indomethacin pre-treatment significantly altered cellular  
162 and transcriptional immune responses during CDI, we sought to determine the impact of this  
163 drug on tissue-level inflammatory protein expression during infection. Infected mice (either

164 exposed to indomethacin or not) were euthanized and ceca were harvested at day 3 post-CDI.  
165 Whole tissue homogenates were used to measure the concentration of a panel of inflammation-  
166 related proteins and were normalized to total protein content per cecum (Fig. 4). The protein  
167 levels observed largely supported the transcriptomics results from our previous results,  
168 confirming what has already been reported for CDI regarding IL-1 $\beta$  and immune mononuclear  
169 cell recruitment and activation proteins like CCL3, CXCL2 and CCL4. Interestingly, IL-6-class  
170 cytokines (IL-6, LIF) were among the most enhanced by indomethacin pre-treatment, consistent  
171 with what has been found in humans infected with *C. difficile*(24, 31, 32). Together with the  
172 increase in IL-1 $\beta$ , and consistent with the above results showing enhanced Th17 responses,  
173 these data implicate an exacerbated IL-17A-related response caused by indomethacin. In  
174 contrast, some type-1-associated inflammatory molecules like IL-12p40 were downregulated by  
175 indomethacin pre-treatment.

176

### 177 ***Indomethacin perturbs colonic epithelial cell junctions of C. difficile-infected mice***

178 The observations describing the increased bacterial translocation (Fig. 1G), together  
179 with the increased local PGE<sub>2</sub> levels (Fig. 1H) and inflammatory molecules (Fig. 3), lead us to  
180 investigate whether the integrity of the intestinal epithelial barrier was compromised due to  
181 indomethacin pre-treatment during CDI. We assessed the impact of indomethacin on the  
182 integrity of colonic epithelial junctions of *C. difficile*-infected mice via transmission electron  
183 microscopy and immunofluorescence staining of tight junction (TJ) and TJ-associated proteins.  
184 Intestinal epithelial cells (IECs) of uninfected, cefoperazone-treated and uninfected,  
185 cefoperazone and indomethacin pre-treated mice had uniform microvilli and intact cell junctions  
186 similar to mock-treated mice (Fig. 5A). *C. difficile* infection resulted in microvilli effacement of  
187 intestinal epithelial cells, but did not appear to cause gross structural alteration of the cell  
188 junctions. In contrast, indomethacin pre-treatment of *C. difficile*-infected mice triggered striking  
189 intestinal epithelial cell separation at the region of the TJs.



190 TJ complexes containing membrane-anchored occludin, claudins and junctional  
191 adhesion molecules (JAMS) attach to the perijunctional actomyosin ring via adaptor proteins  
192 such as zona occludens 1 (ZO1). Consistent with the intact cell junctions observed in IECs of  
193 uninfected mice, Occludin and ZO1 localized at the apex of lateral cell junctions (Fig. 5B and  
194 5C). In contrast, CDI resulted in occludin relocalization to the cytoplasm of epithelial cells. ZO1  
195 redistribution to the cytoplasm, however, was observed only in *C. difficile*-infected mice that  
196 were previously treated with indomethacin. Collectively, our data suggest that indomethacin acts  
197 synergistically with *C. difficile* to alter the localization of occludin and ZO1 and perturb TJ  
198 integrity of intestinal epithelial cells *in vivo*.

199

200 ***Indomethacin alters the intestinal microbiota composition without further reducing***  
201 ***microbial community diversity after antibiotic treatment***

202 The composition of the gut microbiota has a profound impact on the  
203 manifestation and clearance of CDI, as well as the virulence of *C. difficile* and the outcome of  
204 disease(33, 34). There is also evidence suggesting prominent off-target effects of  
205 pharmaceutical agents, such as NSAIDs, on the gut microbiota and gastrointestinal health (20,  
206 35). To examine the impact of indomethacin on the murine gut microbiota, mice were treated  
207 with a two-day course of indomethacin and the microbial community was subsequently  
208 surveyed using 16S rRNA gene sequencing. One day post-treatment, mice given indomethacin  
209 showed no significant alteration in  $\alpha$ -diversity (Fig. S2) but exhibited a significant shift in  
210 community structure compared to untreated mice ( $P < 0.001$ ; AMOVA) (Fig. 6A). To characterize  
211 differentially abundant taxa in indomethacin treated mice, we utilized the biomarker discovery  
212 algorithm LEfSe (linear discriminant analysis (LDA) effect size). Indomethacin treatment was  
213 associated with an enrichment in operational taxonomic units (OTUs) affiliated with the  
214 *Bacteroides* (OTU 1), *Akkermansia* (OTU 4), and *Parasutterella* (OTU 17) genera, and the  
215 *Porphyromonadaceae* (OTU 14) family (Fig. 6B-C). Moreover, we observed a significant

216 decrease in OTUs affiliated with the *Turicibacter* (OTU 18) genus and *Porphyromonadaceae*  
217 (OTU 5) family following indomethacin treatment (Fig. 6B-C). To examine the longitudinal  
218 impact of indomethacin on the murine gut microbiota, we collected samples periodically for 11  
219 days following administration of indomethacin. We observed significant differences in  
220 community structure up to 2 days following administration of indomethacin treatment and a  
221 significant enrichment of *Bacteroides* (OTU 1) could be detected as far as 11-days following  
222 treatment with indomethacin (Fig. 6C). Next, to determine how indomethacin may impact the  
223 microbiota in the context of antibiotic treatment, mice were again exposed to indomethacin for 2  
224 days following 5 days of cefoperazone (0.5 mg/ml) treatment. Although cefoperazone treatment  
225 dramatically reduced overall community  $\alpha$ -diversity in all mice, we detected significant  
226 alterations in community structure associated with co-treatment with indomethacin and  
227 cefoperazone that could be observed 11-days post-treatment (Fig. 6D; Fig. S3). Initial  
228 differences in microbial community structure were driven by a significant bloom in *Paenibacillus*  
229 (OTU 11), while *Akkermansia* (OTU 6) was significantly enriched in mice treated with  
230 indomethacin and cefoperazone on day 11 post-treatment (Fig. 6.E-F). Together these data  
231 suggest that indomethacin has a marked effect on the structure of the gut microbiota and these  
232 off-target effects likely contribute to disease exacerbation during CDI.

## 233 Discussion

234 CDI is the most commonly diagnosed cause of antibiotic-associated diarrhea and has  
235 surpassed methicillin-resistant *Staphylococcus aureus* as the most common healthcare  
236 associated infection in many US hospitals(36). Nearly 30,000 people die each year in the US  
237 from CDI (37). A major challenge of CDI is recurrence, which can impact 20-30% of patients  
238 and is associated with an increased risk of death(4, 38). One of the most promising treatments  
239 for CDI is fecal microbiota transplantation (FMT), which is estimated to be >80% effective in  
240 most studies(39, 40). However, problems with standardization, availability, and putative risks  
241 from FMT have made this form of therapy suboptimal(41). There continues to be a demand for  
242 effective approaches to limit CDI severity and to understand complications arising from the  
243 synergy of CDI with intestinal immune responses and drugs used to limit damaging  
244 inflammatory effects.

245

246 The NSAIDs are among the most commonly prescribed drugs in the US with more than  
247 98 million prescriptions filled annually(14), and an estimated 29 million Americans using over-  
248 the-counter NSAIDs per year(42). As they prevent synthesis of endogenous PGs, NSAIDs can  
249 adversely affect intestinal health. Epidemiological studies reveal an association between CDI  
250 risk and the use of NSAIDs, underscored by a recent meta-analysis(11). The plausibility of a link  
251 between NSAID use and CDI is bolstered by the association between NSAID use and flare-ups  
252 of inflammatory bowel disease and the occasional occurrence of NSAID-induced colitis(43–46).  
253 Recent mouse studies have established that concomitant NSAID use exacerbates active CDI  
254 (Muñoz-Miralles *et al.*, in press, Future Microbiology, 2018).

255

256 Animal and human studies suggest that CDI induces local and systemic increases in  
257 PGs such as PGE<sub>2</sub>(47). Prostaglandin E<sub>2</sub> is one of the most common and well-characterized  
258 PGs, which has long been known to have major effects on gastrointestinal health(48–51). COX-

259 1-dependent production of PGE<sub>2</sub> is gastroprotective, explaining why chronic NSAID use is  
260 associated with stomach ulcers, and why such ulcers can be prevented by administering the  
261 FDA-approved oral PGE analogue misoprostol to NSAID-treated patients(52). In addition,  
262 endogenous PGE<sub>2</sub> production prevents gut epithelial cell death and promotes colonic tumor  
263 growth by directly inducing tumor epithelial cell proliferation, survival, and  
264 migration/invasion(52–54). It is also possible that PGE<sub>2</sub> modulates disease through alteration of  
265 the microbiome, as NSAIDs have been implicated as potentially disrupting the gut  
266 microbiome(20, 55). Additionally, PGE<sub>2</sub> functions as a key inflammatory signal that can regulate  
267 certain immune responses, with its local levels being tightly regulated during the trigger but also  
268 the resolution of inflammatory processes(56–58). Some of the best-known functions of PGE<sub>2</sub>  
269 are indeed its role in intestinal inflammation and cancer, as well as its impact on the immune  
270 system(18). Paradoxically, we observed that pre-treatment with the COX inhibitor indomethacin  
271 caused a dysregulation of PG metabolism that led to increased PGE<sub>2</sub> production upon CDI. This  
272 heightened PGE<sub>2</sub> response was associated with elevated intestinal inflammatory cytokines,  
273 monocyte and neutrophil recruitment, partial dismantling of the intestinal epithelial cells tight  
274 junctions, and a specific disturbed microbiota composition.

275

276 Immune protection against *C. difficile* challenge seems to be independent of CD4<sup>+</sup> cells,  
277 anti-toxin IgG and pIgR(59), but it strongly relies on rapid and effective myeloid cell responses  
278 (9, 37, 60). Cells of the immune system can exert critical roles in controlling bacterial pathogen  
279 damage and intestinal health through production of damaging or protective cytokines by T cells  
280 or Innate Lymphoid Cells (ILCs)(61, 62). Production of IFN $\gamma$  by T cells and neutrophils has a  
281 protective role against CDI(63, 64), and the associated production of IL-12 by innate cells upon  
282 CDI can have a strong positive feedback effect on IFN $\gamma$  production in this context. The role of  
283 IL17 cytokines and their cellular sources is more controversial, as they can induce damage but  
284 also trigger intestinal repair processes and maintain barrier integrity(65, 66). Perturbation of the

285 microbiota induced by antibiotic treatment can also cause an imbalance of protective Treg:Th17  
286 ratios(67). ILCs are however critical for controlling the acute response induced by CDI. In  
287 contrast to Rag1<sup>-/-</sup> mice, Rag2<sup>-/-</sup> Il2ry<sup>-/-</sup> mice rapidly succumb to CDI. While ILC3s display a  
288 limited role to resistance, loss of IFN $\gamma$  expressing ILC1s in Rag1<sup>-/-</sup> mice increased  
289 susceptibility(7). The contribution to CDI pathogenesis by other highly relevant cytokines like IL-  
290 23 and IL-22 provided by innate immune cells strongly depends on context(23, 24, 37, 68–70).  
291 In our studies, we found that indomethacin pre-treatment prior to CDI increased local levels of  
292 chemokines that induce recruitment of inflammatory myeloid cells like CXCL2, CCL3 and CCL4,  
293 with a concomitant increase in circulating and local neutrophils numbers while type 3 ILC were  
294 unaltered. Also, in coordination with the increased levels of intestinal IL-6 and IL-1 $\beta$ , total CD4<sup>+</sup>  
295 cells and CD4<sup>+</sup>ROR $\gamma$ t<sup>+</sup> cells were found in larger numbers in the colonic lamina propria but not  
296 the draining mesenteric lymph nodes.

297

298 Intestinal epithelial cells constitute the main barrier against infectious agents colonizing  
299 the gastrointestinal tract. Cell junctional complexes, notably the tight junctions, regulate  
300 paracellular permeability and restrict the translocation of luminal microbes and microbial  
301 products across the epithelial monolayer(71). Displacement of occludin, but not ZO-1, from the  
302 junctions of mouse colonic epithelial cells during CDI did not manifest as gross morphological  
303 changes of TJ regions during EM visualization. This is reminiscent of the alterations seen in  
304 anti-CD3-, and TNF- $\alpha$ -treated mice, respectively, and consistent with the view that occludin is a  
305 regulator, rather than a key structural component, of TJs(72). However, indomethacin  
306 pretreatment with CDI redistributed both occludin and ZO-1 to the cytosol, and electron  
307 micrographs revealed a concomitant loss of TJ interactions. These changes are expected to  
308 increase paracellular permeability and promote bacterial translocation and could explain the  
309 observed increase in bacterial burden in the livers of indomethacin-treated, *C. difficile*-infected  
310 animals.

311

312 Induction of severe colitis upon CDI is subordinated to alterations in their microbiota  
313 caused by antibiotic administration that lead to dismantling of colonization resistance(5, 33, 37,  
314 73, 74). Interestingly, recent studies have begun to highlight previously underappreciated and  
315 potentially detrimental effects of pharmaceutical drugs, such as NSAIDs, on the gut  
316 microbiota(20, 35). We observed that indomethacin did not cause an alteration of the microbial  
317  $\alpha$ -diversity but did induce significant alterations in microbiota structure that lead to an  
318 enrichment of *Bacteroides*, *Akkermansia*, *Porphyromonadaceae*, and *Parasutterella*, and a  
319 decrease in *Turicibacter* and *Porphyromonadaceae*. Interestingly, increases in *Bacteroides* and  
320 *Akkermansia* have been reported in association with inflammatory bowel disease and other  
321 infections(75–78). Furthermore, *Turicibacter* has been shown in several studies to be  
322 associated with colonization resistance to *C. difficile*(6, 79). Thus, indomethacin-mediated  
323 alterations in the microbiota may have a profound impact on manifestation and severity of CDI.  
324 Interestingly, when the microbiota  $\alpha$ -diversity was severely reduced by antibiotic treatment, we  
325 found that *Paenibacillus* and *Akkermansia* expanded in mice pretreated with indomethacin. At  
326 present, the role of *Paenibacillus* in the pathology of CDI is unknown and further investigation is  
327 warranted.

328

329 Injury to intestinal epithelial barriers and microbial translocation can lead to a systemic  
330 response that mimics some aspects of sepsis and unveils a massive release of inflammatory  
331 cytokines, like IL-1 $\beta$ , and increases neutrophil and macrophage recruitment and activation (24).  
332 It is still unclear how the innate and adaptive arms of the immune response coordinate during  
333 CDI, especially in situations like the one we present with pre-treatment with indomethacin. In  
334 such circumstances, it is important to note that Type 3 ILCs can dysregulate adaptive immune  
335 CD4<sup>+</sup> cell responses against commensal bacteria, but this ILC-mediated regulation of adaptive  
336 immune cells occurred independently of interleukin (IL)-17A, IL-22 or IL-23, but is dependent on

337 antigen presentation(80). Additionally, antibiotics alone can promote inflammation through  
338 goblet cell-mediated translocation of native colonic microbiota in mice(81), but CDI induces  
339 significant goblet cell loss(82), which would counter effect this bacterial translocation in the  
340 experimental conditions such as those described in this work.

341

342 Our results highlight the capacity of a short-term oral dose of the NSAID indomethacin to  
343 cause an imbalance in PG production and disrupt the intestinal barrier to allow for bacterial  
344 entrance in the bloodstream. These effects are paralleled by a specific disarrangement of the  
345 intestinal microbiota and dysregulated inflammatory and immune responses that lead to  
346 increase pathological damage and finally unfold in an increased mortality rate. Our results call  
347 for caution in the use of NSAIDs in the context of *C. difficile* infections, but also potentially when  
348 other intestinal pathogens or insults co-occur with acute inflammatory events that affect PG  
349 balances. Moreover, we also highlight how a temporary modification of a set of key  
350 inflammatory mediators like PGs in the host can lead to significant perturbations to the resident  
351 gut microbiota. We believe that this unique combination of effects caused by indomethacin and  
352 CDI in the host and their microbiota could represent a generalized mechanism that leads to  
353 increased intestinal damage and complications when NSAIDs, or other drugs that alter key  
354 inflammatory molecules with pleiotropic effects, are used.

## 355 **Materials and Methods**

### 356 **Experimental animals and infection model**

357 All mice used in this study were obtained from Jackson laboratories (C57 BL6J) and were  
358 females of 6 weeks of age at arrival. Mice were given 2 weeks' time to adapt to the new facilities  
359 and avoid stress associated responses and allow for in-house conditions adaptations. Mice  
360 were given Cefoperazone at 0.5 mg/ml in drinking water ad libitum for 5 days prior to treatment  
361 with Indomethacin (Cayman Chemical) at 10 mg/kg or vehicle (PBS) for 2 consecutive days by  
362 oral gavage and then infected or not with  $1 \times 10^4$  spores of *Clostridium difficile* (NAP1/BI/027 strain  
363 M7404, O'Connor *et al.*, 2009) resuspended in PBS by oral gavage. Non-infected mice received  
364 only cefoperazone but afterwards only vehicle by oral gavage at the same time points. For some  
365 experiments untreated mice were used to obtain unaltered cecal microbiota.

366

### 367 ***mRNA isolation, expression analysis and qRT-PCR***

368 After bulk RNA isolation was isolated from tissues with Trizol (Life Technologies) following  
369 manufacturer's instructions, a QIAGEN RNeasy Plus Mini Kit was used to further purify mRNA for  
370 downstream analysis. mRNA expression was evaluated either using an nSolver inflammation  
371 panel mouse v2 from Nanostring directly on mRNA samples or by qRT-PCR performed using  
372 Applied Biosystems TaqMan amplification system after cDNA generation using a SuperScript  
373 VILO cDNA synthesis Kit (Invitrogen). qRT-PCR reactions, data quantification and analysis  
374 were performed in an Applied Biosystems 7300 Real Time PCR system using the following  
375 Taqman Primers: Reg3g (Mm00441127\_m1), Muc2 (Mm01276696\_m1), Ptger2  
376 (Mm004360516\_m1), Ptger4 (Mm004360513\_m1), Ptgs1 (Mm00477214\_m1), Ptgs2  
377 (Mm00478374\_m1), Ptges (Mm00452105\_m1), Hpgd (Mm00515121\_m1), and Gapdh  
378 (Mm99999915\_g1). Data generated by Nanostring technologies for mRNA quantification was  
379 analyzed with the company's proprietary software nSolver 4.0.

380



381 ***Bacterial burden in mouse organs***

382 Liver was collected from the mouse with sanitized instruments and immediately placed in 1 mL  
383 of PBS in a 12 well plate. After the tissue was minced with scissors, 20 mL of the supernatant  
384 was drawn off and serially diluted. Dilutions were plated on TCCFA plates under aerobic and  
385 anaerobic conditions. After 24 hours, the plates were collected, CFUs were calculated and  
386 normalized to the weight of the liver. Cecum was also collected using sanitized instruments, and  
387 contents were expelled by placing pressure on the organ with a scalpel. Contents were then  
388 collected and put into a 1.5 ml tube. Weight of the contents was recorded, PBS was added,  
389 vortexed, and the slurry was serially diluted and plated onto TCCFA plates (Anaerobe Systems).  
390 After 24 hours, CFUs were counted and normalized to the weight of each sample.

391

392 ***Tissue protein quantification and multiplex***

393 Total cecum protein was isolated from ceca pre-washed with ice-cold PBS, homogenized a  
394 tissue shredder (Tissuemiser) and then centrifuged for 3 min at 8,600 g. Supernatants of these  
395 preparations were submitted for Luminex analysis of the provided analytes using x-map  
396 technology via the MapgPix® system, in combination with multiplex kits from Millipore Sigma.  
397 Total tissue protein content was quantified by DC assay. Data was analyzed with GraphPad  
398 Prism 6.0, and heat maps were generated using the Morpheus software from the Broad Institute  
399 (<https://software.broadinstitute.org/morpheus/>).

400

401 ***Flow cytometry***

402 Cell suspensions from the mesenteric lymph nodes, peritoneal lavage and colon lamina propria  
403 from euthanized mice were obtained from mice at the indicated time points. Cell suspensions  
404 were incubated with Fc-block for 15 minutes on ice and then surface stained with a cocktail  
405 containing monoclonal anti mouse antibodies containing anti-CD19 (1D3), CD8a (5H10-1), anti-  
406 CD49b (DX5), anti-CD11b (M1/70), anti-CD11c (N418) and anti-CD196 (x29-2l.17) from

407 Biologend as well as anti-CD4 (RM4-5) and anti-Ly6G (1A8) from BD. After 30 minutes  
408 incubation on ice, cells were washed, fixed and permeabilized using the FoxP3 Fix/Perm buffer  
409 kit from eBiosciences/ThermoFisher and intracellular staining for ROR $\gamma$ t (clone Q31-378) was  
410 performed as a last step. Flow cytometry data was obtained with BD FACSDiva™ 7.0 software  
411 and .fcs 3.0 files analyzed with FlowJo™.

412

### 413 ***Electron and Immunofluorescence microscopy***

414 Colonic tissue samples were fixed and stored in Karnovsky's solution (4% paraformaldehyde in  
415 PBS (pH 7.4) with 1% glutaraldehyde) for at least 24 hrs at 4°C. Samples were neutralized with  
416 125 mM glycine in PBS, post-fixed in 1% osmium tetroxide, and sequentially dehydrated with  
417 15%, 30%, 50%, 70%, 90% and 100% ethanol. Samples were then infiltrated with Spurr's Resin  
418 (Electron Microscopy Sciences, Hatfield, PA). Ultra-thin sections were contrasted with 2%  
419 uranyl acetate, followed by Reynold's lead citrate and visualized with an FEI Tecnai Spirit  
420 transmission electron microscope (FEI, Hillsboro, OR) equipped with AMT CCD camera and  
421 AMT Image Capture Engine V602 software (Advanced Microscopy Techniques, Woburn, MA).  
422 For immunofluorescence microscopy tissue samples were frozen in OCT embedding medium  
423 (Tissue-Tek, Sakura Finetek, CA) and stored at -80°C. OCT-mounted tissue samples were  
424 sectioned at 3  $\mu$ m thickness and fixed in 4% paraformaldehyde in PBS (pH 7.4) for 20 minutes  
425 at room temperature. Samples were washed with PBS, permeabilized with 0.2% Triton X-100 in  
426 PBS, quenched with 50 mM NH<sub>4</sub>Cl in PBS and then blocked with 5% IgG-free bovine serum  
427 albumin (BSA) in PBS. Primary antibodies used were 1:50 dilution of rabbit anti-occludin and  
428 rabbit anti-ZO1 (Abcam, Cambridge, MA). Samples were incubated with primary antisera  
429 overnight at 4°C, and then washed three times with 1% IgG-free BSA in PBS. Secondary  
430 antibodies (Alexa Fluor 555-conjugated anti-rabbit IgG) were added at 8  $\mu$ g/ml in 5% IgG-free  
431 BSA for 1 hour. Samples were washed with PBS, stained with 4,6-diamidino-2-phenylindole  
432 (DAPI) and mounted in ProLong Diamond Antifade reagent (Thermo Fisher Scientific, Waltham,

433 MA). Images were captured using DeltaVision Elite Deconvolution Microscope (GE Healthcare,  
434 Pittsburgh, PA) equipped with Olympus 100X/1.40 oil objective and using immersion oil  
435 (n=1.516) and GE Healthcare Software Version 6.5.2. ImageJ 1.51j8 (National Institutes of  
436 Health, Bethesda, MA) was used to merge and pseudocolor images.

437

#### 438 ***Colon histology and pathology scoring***

439 Colons from experimental mice were collected at day 3 post-infection, then flushed with cold  
440 PBS, open longitudinally and rolled to generate swiss rolls. This colon rolls were fixed for 5 days  
441 in 10% buffered Formalin Phosphate and then transferred to 70% ethanol for 7 days. After that,  
442 these Swiss rolls were used to generate paraffin blocks that were stained with H&E and scored  
443 for the degree of injuries as described in Theriot CM et al., Gut Microbes 2:6, 326-34. 2011.

444

#### 445 ***DNA extraction, 16S rRNA gene sequencing, and gut microbiota analyses***

446 Fecal samples were collected fresh from individual mice at prior to (baseline) and following  
447 treatment with cefoperazone, indomethacin, or a combination of cefoperazone and  
448 indomethacin. In a subset of mice (N=6/group), fecal samples were collected for the time  
449 course of a post-treatment 11-day recovery period. Following collection, fecal samples were  
450 immediately put on ice and subsequently frozen for storage at -20 °C. Microbial genomic  
451 DNA was extracted using the 96-well PowerSoil DNA isolation kit (Qiagen). For each  
452 sample, the V4 region of the bacterial 16S rRNA gene was amplified and sequenced using  
453 the Illumina MiSeq Sequencing platform as described elsewhere (Kozich et al., 2013).  
454 Sequences were curated using the mothur software package (v1.40.3) as previously  
455 described (Zackular et al., 2016; Schloss et al., 2009; Kozich et al., 2013). Briefly, the  
456 workflow we used included generating contigs with paired-end reads, filtering low quality  
457 sequences, aligning the resulting sequences to the SILVA 16S rRNA sequence database,  
458 and removed any chimeric sequences flagged by UCHIME. Following curation, we obtained

459 between 9 and 83,525 sequences per sample (median = 13,161.5), with a median length of  
460 253 bp. To minimize the impact of uneven sampling, the number of sequences in each  
461 sample was rarefied to 4200. Sequences were clustered into OTUs based on a 3% distance  
462 cutoff calculated using the OptiClust algorithm. All sequences were classified using the  
463 Ribosomal Database Project training set (version 16) and OTUs were assigned a taxonomic  
464 classification using a naive Bayesian classifier. Significantly altered OTUs for each group  
465 were selected using the biomarker discovery algorithm LEfSe (linear discriminant analysis  
466 (LDA) effect size) in mothur (Segata et al., 2011).  $\alpha$ -diversity was calculated using the  
467 Shannon diversity index and  $\beta$ -diversity was calculated using the  $\theta_{YC}$  distance metric with  
468 OTU frequency data. FASTQ sequence data obtained in this study has been deposited to the  
469 Sequence Read Archive (SRA) at NCBI under the accession number SRP152292.

470

#### 471 **Authors contributions**

472 D.M.A., D.M., and J.P.Z. designed the research and analyzed the data. D.M., J.P.Z., B.T.,  
473 L.K., J.L.R., L.M.R., and M.K.W. performed the experiments, J.P.Z. generated the microbiota  
474 libraries and performed the corresponding bioinformatics analysis. V.K.V., G.V., L.J.C. and  
475 P.S., helped in with data analysis and interpretation. D.M., J.P.Z., and D.M.A. wrote the  
476 manuscript, and J.L.R., V.K.V., and E.S. proofread the manuscript.

## 477 References

- 478 1. Lessa FC, Gould C V., Clifford McDonald L. 2012. Current status of clostridium difficile infection  
479 epidemiology. Clin Infect Dis.
- 480 2. Leffler DA, Lamont JT. 2015. Clostridium difficile infection. N Engl J Med 372:1539–48.
- 481 3. Buonomo EL, Petri WA. 2016. The microbiota and immune response during Clostridium difficile  
482 infection. Anaerobe 41:79–84.
- 483 4. Lessa FC, Mu Y, Bamberg WM, Beldavs ZG, Dumyati GK, Dunn JR, Farley MM, Holzbauer SM,  
484 Meek JI, Phipps EC, Wilson LE, Winston LG, Cohen JA, Limbago BM, Fridkin SK, Gerding DN,  
485 McDonald LC. 2015. Burden of *Clostridium difficile* Infection in the United States. N Engl J Med  
486 372:825–834.
- 487 5. Collins J, Robinson C, Danhof H, Knetsch CW, Van Leeuwen HC, Lawley TD, Auchtung JM,  
488 Britton RA. 2018. Dietary trehalose enhances virulence of epidemic Clostridium difficile. Nature  
489 553:291–294.
- 490 6. Zackular JP, Moore JL, Jordan AT, Juttukonda LJ, Noto MJ, Nicholson MR, Crews JD, Semler  
491 MW, Zhang Y, Ware LB, Washington MK, Chazin WJ, Caprioli RM, Skaar EP. 2016. Dietary zinc  
492 alters the microbiota and decreases resistance to Clostridium difficile infection. Nat Med 22:1330–  
493 1334.
- 494 7. Abt MC, Lewis BB, Caballero S, Xiong H, Carter RA, Susac B, Ling L, Leiner I, Pamer EG. 2015.  
495 Innate immune defenses mediated by two ilc subsets are critical for protection against acute  
496 clostridium difficile infection. Cell Host Microbe 18:27–37.
- 497 8. Garey KW, Jiang Z-D, Ghantaji S, Tam VH, Arora V, Dupont HL. 2010. A common polymorphism  
498 in the interleukin-8 gene promoter is associated with an increased risk for recurrent Clostridium  
499 difficile infection. Clin Infect Dis 51:1406–10.
- 500 9. Jarchum I, Liu M, Shi C, Equinda M, Pamer EG. 2012. Critical role for myd88-Mediated Neutrophil  
501 recruitment during Clostridium difficile colitis. Infect Immun 80:2989–2996.
- 502 10. Madan R, Petri WA. 2012. Immune responses to Clostridium difficile infection. Trends Mol Med  
503 18:658–666.
- 504 11. Permpalung N, Upala S, Sanguankeo A, Sornprom S. 2016. Association between NSAIDs and  
505 Clostridium difficile-Associated Diarrhea: A Systematic Review and Meta-Analysis. Can J

- 506 Gastroenterol Hepatol 2016:7431838.
- 507 12. Liang X, Bittinger K, Xuanwen L, Abernethy DR, Bushman FD, Fitzgerald GA. 2015. Bidirectional  
508 interactions between indomethacin and the murine intestinal microbiota. *Elife* 4.
- 509 13. Xiao X, Nakatsu G, Jin Y, Wong S, Yu J, Lau JYW. 2017. Gut Microbiota Mediates Protection  
510 Against Enteropathy Induced by Indomethacin. *Sci Rep* 7.
- 511 14. Cryer B, Barnett MA, Wagner J, Wilcox CM. 2016. Overuse and Misperceptions of Nonsteroidal  
512 Anti-inflammatory Drugs in the United States. *Am J Med Sci* 352:472–480.
- 513 15. Fowler TO, Durham CO, Planton J, Edlund BJ. 2014. Use of nonsteroidal anti-inflammatory drugs  
514 in the older adult. *J Am Assoc Nurse Pract* 26:414–423.
- 515 16. Tonolini M. 2013. Acute nonsteroidal anti-inflammatory drug-induced colitis. *J Emerg Trauma*  
516 *Shock* 6:301–3.
- 517 17. Villanacci V, Casella G, Bassotti G. 2011. The spectrum of drug-related colitides: Important  
518 entities, though frequently overlooked. *Dig Liver Dis* 43:523–528.
- 519 18. Montrose DC, Nakanishi M, Murphy RC, Zarini S, McAleer JP, Vella AT, Rosenberg DW. 2015.  
520 The role of PGE2 in intestinal inflammation and tumorigenesis. *Prostaglandins Other Lipid Mediat*  
521 *116–117:26–36*.
- 522 19. Blackler RW, De Palma G, Manko A, Da Silva GJ, Flannigan KL, Bercik P, Surette MG, Buret AG,  
523 Wallace JL. 2015. Deciphering the pathogenesis of NSAID enteropathy using proton pump  
524 inhibitors and a hydrogen sulfide-releasing NSAID. *Am J Physiol Liver Physiol* 308:G994–G1003.
- 525 20. Rogers MAM, Aronoff DM. 2015. The Influence of Nonsteroidal Anti-Inflammatory Drugs on the  
526 Gut Microbiome. *Clin Microbiol Infect* 22:178.e1-178.e9.
- 527 21. Syer SD, Blackler RW, Martin R, de Palma G, Rossi L, Verdu E, Bercik P, Surette MG,  
528 Aucouturier A, Langella P, Wallace JL. 2015. NSAID enteropathy and bacteria: a complicated  
529 relationship. *J Gastroenterol*.
- 530 22. X. X, D. N, Y. J, J. Y, J.Y. L. 2015. Beneficial changes in intestinal microbiota during indomethacin  
531 treatment in mice. *Gastroenterology* 148:S730.
- 532 23. Buonomo EL, Madan R, Pramoongjago P, Li L, Okusa MD, Petri WA. 2013. Role of interleukin 23  
533 signaling in clostridium difficile colitis, p. 917–920. *In Journal of Infectious Diseases*.
- 534 24. Hasegawa M, Kamada N, Jiao Y, Liu MZ, Núñez G, Inohara N. 2012. Protective role of

- 535 commensals against *Clostridium difficile* infection via an IL-1 $\beta$ -mediated positive-feedback loop. *J*  
536 *Immunol* 189:3085–91.
- 537 25. Jafari N V., Kuehne SA, Bryant CE, Elawad M, Wren BW, Minton NP, Allan E, Bajaj-Elliott M.  
538 2013. *Clostridium difficile* Modulates Host Innate Immunity via Toxin-Independent and Dependent  
539 Mechanism(s). *PLoS One* 8.
- 540 26. Kamada N, Chen GY, Inohara N, Núñez G. 2013. Control of pathogens and pathobionts by the gut  
541 microbiota. *Nat Immunol* 14:685–690.
- 542 27. Bjarnason I, Zanelli G, Smith T, Prouse P, Williams P, Smethurst P, Delacey G, Gumpel MJ, Levi  
543 AJ. 1987. Nonsteroidal antiinflammatory drug-induced intestinal inflammation in humans.  
544 *Gastroenterology* 93:480–9.
- 545 28. Berg DJ, Zhang J, Weinstock J V., Ismail HF, Earle KA, Alila H, Pamukcu R, Moore S, Lynch RG.  
546 2002. Rapid development of colitis in NSAID-treated IL-10-deficient mice. *Gastroenterology*  
547 123:1527–1542.
- 548 29. Feuerstadt P. 2015. *Clostridium difficile* Infection. *Clin Transl Gastroenterol* 6.
- 549 30. Mukherjee S, Hooper L V. 2015. Antimicrobial Defense of the Intestine. *Immunity* 42:28–39.
- 550 31. Rao K, Erb-Downward JR, Walk ST, Micic D, Falkowski N, Santhosh K, Mogle JA, Ring C, Young  
551 VB, Huffnagle GB, Aronoff DM. 2014. The systemic inflammatory response to *clostridium difficile*  
552 infection. *PLoS One* 9.
- 553 32. Shi C, Pamer EG. 2014. Monocyte Recruitment During Infection and Inflammation. *Nat Rev*  
554 *Immunol* 11:762–774.
- 555 33. Buffie CG, Jarchum I, Equinda M, Lipuma L, Gobourne A, Viale A, Ubeda C, Xavier J, Pamer EG.  
556 2012. Profound alterations of intestinal microbiota following a single dose of clindamycin results in  
557 sustained susceptibility to *Clostridium difficile*-induced colitis. *Infect Immun* 80:62–73.
- 558 34. Jenior ML, Leslie JL, Young VB, Schloss PD. 2017. *Clostridium difficile* Colonizes Alternative  
559 Nutrient Niches during Infection across Distinct Murine Gut Microbiomes. *mSystems* 2:e00063-17.
- 560 35. Maier L, Pruteanu M, Kuhn M, Zeller G, Telzerow A, Anderson EE, Brochado AR, Fernandez KC,  
561 Dose H, Mori H, Patil KR, Bork P, Typas A. 2018. Extensive impact of non-antibiotic drugs on  
562 human gut bacteria. *Nature* 555:623–628.
- 563 36. Evans CT, Safdar N. 2015. Current trends in the epidemiology and outcomes of *clostridium difficile*

- 564 infection. *Clin Infect Dis* 60:S66–S71.
- 565 37. Abt MC, McKenney PT, Pamer EG. 2016. Clostridium difficile colitis: Pathogenesis and host  
566 defence. *Nat Rev Microbiol*.
- 567 38. Olsen MA, Yan Y, Reske KA, Zilberberg MD, Dubberke ER. 2015. Recurrent Clostridium difficile  
568 infection is associated with increased mortality. *Clin Microbiol Infect* 21:164–170.
- 569 39. Newman KM, Rank KM, Vaughn BP, Khoruts A. 2017. Treatment of recurrent Clostridium difficile  
570 infection using fecal microbiota transplantation in patients with inflammatory bowel disease. *Gut*  
571 *Microbes*.
- 572 40. Smits LP, Bouter KEC, De Vos WM, Borody TJ, Nieuwdorp M. 2013. Therapeutic potential of fecal  
573 microbiota transplantation. *Gastroenterology* 145:946–953.
- 574 41. Bojanova DP, Bordenstein SR. 2016. Fecal Transplants: What Is Being Transferred? *PLoS Biol*  
575 14.
- 576 42. Zhou Y, Boudreau DM, Freedman AN. 2014. Trends in the use of aspirin and nonsteroidal anti-  
577 inflammatory drugs in the general U.S. population. *Pharmacoepidemiol Drug Saf* 23:43–50.
- 578 43. Ananthakrishnan AN, Higuchi LM, Huang ES, Khalili H, Richter JM, Fuchs CS, Chan AT. 2012.  
579 Aspirin, nonsteroidal anti-inflammatory drug use, and risk for Crohn disease and ulcerative colitis:  
580 a cohort study. *Ann Intern Med* 156:350–359.
- 581 44. Kelsen JR, Kim J, Latta D, Smathers S, McGowan KL, Zaoutis T, Mamula P, Baldassano RN.  
582 2011. Recurrence rate of clostridium difficile infection in hospitalized pediatric patients with  
583 inflammatory bowel disease. *Inflamm Bowel Dis* 17:50–55.
- 584 45. Kvasnovsky CL, Aujla U, Bjarnason I. 2014. Nonsteroidal anti-inflammatory drugs and  
585 exacerbations of inflammatory bowel disease. *Scand J Gastroenterol* 50:255–263.
- 586 46. Sokol H, Lalande V, Landman C, Bourrier A, Nion-Larmurier I, Rajca S, Kirchgessner J, Seksik P,  
587 Cosnes J, Barbut F, Beaugerie L. 2017. Clostridium difficile infection in acute flares of  
588 inflammatory bowel disease: A prospective study. *Dig Liver Dis* 49:643–646.
- 589 47. Kim H, Rhee SH, Pothoulakis C, LaMont JT. 2007. Inflammation and Apoptosis in Clostridium  
590 difficile Enteritis Is Mediated by PGE2 Up-Regulation of Fas Ligand. *Gastroenterology* 133:875–  
591 886.
- 592 48. Miyoshi H, VanDussen KL, Malvin NP, Ryu SH, Wang Y, Sonnek NM, Lai C, Stappenbeck TS.



- 593 2017. Prostaglandin E2 promotes intestinal repair through an adaptive cellular response of  
594 the epithelium. *EMBO J* 36:5–24.
- 595 49. Roulis M, Nikolaou C, Kotsaki E, Kaffe E, Karagianni N, Koliaraki V, Salpea K, Ragoussis J,  
596 Aidinis V, Martini E, Becker C, Herschman HR, Vetrano S, Danese S, Kollias G. 2014. Intestinal  
597 myofibroblast-specific Tpl2-Cox-2-PGE2 pathway links innate sensing to epithelial homeostasis.  
598 *Proc Natl Acad Sci* 111:E4658–E4667.
- 599 50. Stenson WF. 2007. Prostaglandins and epithelial response to injury. *Curr Opin Gastroenterol*.
- 600 51. Wells JM, Rossi O, Meijerink M, van Baarlen P. 2011. Epithelial crosstalk at the microbiota-  
601 mucosal interface. *Proc Natl Acad Sci* 108:4607–4614.
- 602 52. Lanas A, Sopeña F. 2009. Nonsteroidal Anti-Inflammatory Drugs and Lower Gastrointestinal  
603 Complications. *Gastroenterol Clin North Am*.
- 604 53. Nakanishi M, Rosenberg DW. 2013. Multifaceted roles of PGE2 in inflammation and cancer.  
605 *Semin Immunopathol*.
- 606 54. Schumacher Y, Aparicio T, Ourabah S, Baraille F, Martin A, Wind P, Dentin R, Postic C, Guilmeau  
607 S. 2016. Dysregulated CRTC1 activity is a novel component of PGE2 signaling that contributes to  
608 colon cancer growth. *Oncogene* 35:2602–2614.
- 609 55. van Opstal E, Kolling GL, Moore JH, Coquery CM, Wade NS, Loo WM, Bolick DT, Shin JH,  
610 Erickson LD, Warren CA. 2016. Vancomycin Treatment Alters Humoral Immunity and Intestinal  
611 Microbiota in an Aged Mouse Model of *Clostridium difficile* Infection. *J Infect Dis* 214:jjw071.
- 612 56. Agard M, Asakrah S, Morici LA. 2013. PGE(2) suppression of innate immunity during mucosal  
613 bacterial infection. *Front Cell Infect Microbiol* 3:45.
- 614 57. Duffin R, OConnor RA, Crittenden S, Forster T, Yu C, Zheng X, Smyth D, Robb CT, Rossi F,  
615 Skouras C, Tang S, Richards J, Pellicoro A, Weller RB, Breyer RM, Mole DJ, Iredale JP, Anderton  
616 SM, Narumiya S, Maizels RM, Ghazal P, Howie SE, Rossi AG, Yao C. 2016. Prostaglandin E2  
617 constrains systemic inflammation through an innate lymphoid cell-IL-22 axis. *Science* (80- )  
618 351:1333–1338.
- 619 58. Yao C, Sakata D, Esaki Y, Li Y, Matsuoka T, Kuroiwa K, Sugimoto Y, Narumiya S. 2009.  
620 Prostaglandin E2–EP4 signaling promotes immune inflammation through TH1 cell differentiation  
621 and TH17 cell expansion. *Nat Med* 15:633–640.

- 622 59. Johnston PF, Gerding DN, Knight KL. 2014. Protection from clostridium difficile infection in CD4 T  
623 cell- and polymeric immunoglobulin receptor-deficient mice. *Infect Immun* 82:522–531.
- 624 60. Duque GA, Descoteaux A. 2014. Macrophage cytokines: Involvement in immunity and infectious  
625 diseases. *Front Immunol*.
- 626 61. Mcsorley SJ. 2014. Immunity to intestinal pathogens: Lessons learned from Salmonella. *Immunol*  
627 *Rev*.
- 628 62. Sonnenberg GF, Artis D. 2015. Innate lymphoid cells in the initiation, regulation and resolution of  
629 inflammation. *Nat Med*.
- 630 63. Ishida Y, Maegawa T, Kondo T, Kimura A, Iwakura Y, Nakamura S, Mukaida N. 2004. Essential  
631 involvement of IFN-gamma in Clostridium difficile toxin A-induced enteritis. *J Immunol* 172:3018–  
632 25.
- 633 64. Yu H, Chen K, Sun Y, Carter M, Garey KW, Savidge TC, Devaraj S, Tessier ME, Von Rosenvinge  
634 EC, Kelly CP, Pasetti MF, Feng H. 2017. Cytokines are markers of the Clostridium difficile-induced  
635 inflammatory response and predict disease severity. *Clin Vaccine Immunol* 24.
- 636 65. Lee JS, Tato CM, Joyce-Shaikh B, Gulan F, Cayatte C, Chen Y, Blumenschein WM, Judo M,  
637 Ayanoglu G, McClanahan TK, Li X, Cua DJ. 2015. Interleukin-23-Independent IL-17 Production  
638 Regulates Intestinal Epithelial Permeability. *Immunity* 43:727–738.
- 639 66. McDermott AJ, Falkowski NR, McDonald RA, Pandit CR, Young VB, Huffnagle GB. 2016.  
640 Interleukin-23 (IL-23), independent of IL-17 and IL-22, drives neutrophil recruitment and innate  
641 inflammation during Clostridium difficile colitis in mice. *Immunology* 147:114–124.
- 642 67. Becattini S, Taur Y, Pamer EG. 2016. Antibiotic-Induced Changes in the Intestinal Microbiota and  
643 Disease. *Trends Mol Med* xx:1–21.
- 644 68. Aden K, Rehman A, Falk-Paulsen M, Secher T, Kuiper J, Tran F, Pfeuffer S, Sheibani-Tezerji R,  
645 Breuer A, Luzius A, Jentzsch M, Häsler R, Billmann-Born S, Will O, Lipinski S, Bharti R, Adolph T,  
646 Iovanna JL, Kempster SL, Blumberg RS, Schreiber S, Becher B, Chamailard M, Kaser A,  
647 Rosenstiel P. 2016. Epithelial IL-23R Signaling Licenses Protective IL-22 Responses in Intestinal  
648 Inflammation. *Cell Rep* 16:2208–2218.
- 649 69. Cowardin CA, Kuehne SA, Buonomo EL, Marie CS, Minton NP, Petri WA. 2015. Inflammasome  
650 activation contributes to interleukin-23 production in response to Clostridium difficile. *MBio* 6.

- 651 70. Lee YS, Yang H, Yang JY, Kim Y, Lee SH, Kim JH, Jang YJ, Vallance BA, Kweon MN. 2015.  
652 Interleukin-1 (IL-1) signaling in intestinal stromal cells controls KC/ CXCL1 secretion, which  
653 correlates with recruitment of IL-22- secreting neutrophils at early stages of *Citrobacter rodentium*  
654 infection. *Infect Immun* 83:3257–3267.
- 655 71. Roxas JL, Viswanathan VK. 2018. Modulation of intestinal paracellular transport by bacterial  
656 pathogens. *Compr Physiol* 8:823–842.
- 657 72. Marchiando AM, Shen L, Vallen Graham W, Weber CR, Schwarz BT, Austin JR, Raleigh DR,  
658 Guan Y, Watson AJM, Montrose MH, Turner JR. 2010. Caveolin-1-dependent occludin  
659 endocytosis is required for TNF-induced tight junction regulation in vivo. *J Cell Biol* 189:111–126.
- 660 73. Chen X, Katchar K, Goldsmith JD, Nanthakumar N, Cheknis A, Gerding DN, Kelly CP. 2008. A  
661 mouse model of *Clostridium difficile*-associated disease. *Gastroenterology* 135:1984–1992.
- 662 74. Theriot CM, Koumpouras CC, Carlson PE, Bergin II, Aronoff DM, Young VB. 2011. Cefoperazone-  
663 treated mice as an experimental platform to assess differential virulence of *Clostridium difficile*  
664 strains. *Gut Microbes* 2:326–334.
- 665 75. Imhann F, Vila AV, Bonder MJ, Fu J, Gevers D, Visschedijk MC, Spekhorst LM, Alberts R, Franke  
666 L, van Dullemen HM, Ter Steege RWF, Huttenhower C, Dijkstra G, Xavier RJ, Festen EAM,  
667 Wijmenga C, Zhernakova A, Weersma RK. 2016. Interplay of host genetics and gut microbiota  
668 underlying the onset and clinical presentation of inflammatory bowel disease. *Gut*.
- 669 76. Pascal V, Pozuelo M, Borruel N, Casellas F, Campos D, Santiago A, Martinez X, Varela E,  
670 Sarrabayrouse G, Machiels K, Vermeire S, Sokol H, Guarner F, Manichanh C. 2017. A microbial  
671 signature for Crohn’s disease. *Gut* 66:813–822.
- 672 77. Seregin SS, Golovchenko N, Schaf B, Chen J, Pudlo NA, Mitchell J, Baxter NT, Zhao L, Schloss  
673 PD, Martens EC, Eaton KA, Chen GY. 2017. NLRP6 Protects Il10<sup>-/-</sup> Mice from Colitis by Limiting  
674 Colonization of *Akkermansia muciniphila*. *Cell Rep* 19:733–745.
- 675 78. Tedjo DI, Smolinska A, Savelkoul PH, Masclee AA, Van Schooten FJ, Pierik MJ, Penders J,  
676 Jonkers DMAE. 2016. The fecal microbiota as a biomarker for disease activity in Crohn’s disease.  
677 *Sci Rep* 6.
- 678 79. Schubert AM, Rogers M a M, Ring C, Mogle J, Petrosino JP, Young VB, Aronoff DM, Schloss PD.  
679 2014. Microbiome Data Distinguish Patients with *Clostridium difficile* Infection and Non- *C. difficile*

- 680 -Associated Diarrhea from Healthy. *MBio* 5:1–9.
- 681 80. Hepworth MR, Monticelli LA, Fung TC, Ziegler CGK, Grunberg S, Sinha R, Mantegazza AR, Ma  
682 H-L, Crawford A, Angelosanto JM, Wherry EJ, Koni PA, Bushman FD, Elson CO, Eberl G, Artis D,  
683 Sonnenberg GF. 2013. Innate lymphoid cells regulate CD4+ T-cell responses to intestinal  
684 commensal bacteria. *Nature* 498:113–117.
- 685 81. Knoop K a., McDonald KG, Kulkarni DH, Newberry RD. 2015. Antibiotics promote inflammation  
686 through the translocation of native commensal colonic bacteria. *Gut* 1–10.
- 687 82. Batah J, Kobeissy H, Pham PTB, Denève-Larrazet C, Kuehne S, Collignon A, Janoir-  
688 Jouveshomme C, Marvaud JC, Kansau I. 2017. *Clostridium difficile* flagella induce a pro-  
689 inflammatory response in intestinal epithelium of mice in cooperation with toxins. *Sci Rep* 7.

690 **Figure legends**

691 **Fig. 1: Indomethacin worsens *C. difficile* in mice.**

692 C57BL/6 mice were treated with cefoperazone for 5 days followed by 2 days of recovery and  
693 then challenged by gavage with  $1 \times 10^4$  spores of the NAP1 strain M7404. Animals received 2  
694 doses of 10 mg/kg of indomethacin by gavage daily as indicated by the top arrows in **(A)**.  
695 Representative picture illustrating the macroscopic effects of the different treatments in the  
696 cecum **(B)**. Mice were monitored for survival **(C)**, weight loss **(D)**, and histopathologic severity of  
697 colitis **(E)**. *C. difficile* bacterial burden was evaluated in the ceca of 12 mice/group **(F)**, and total  
698 aerobic + anaerobic bacterial burden in the liver of 5 mice/group **(G)** also at day 3 after infection,  
699 with the discontinuous line indicating limit of detection. \*\* $P < 0.01$  by Log-rank (Mantel-Cox) test  
700 for survival and \* $P < 0.05$ , \*\* $P < 0.01$  by unpaired t test.

701

702 **Fig. 2: Indomethacin alters the proportions of neutrophils and CD4<sup>+</sup> T cells in mucosal**  
703 **associated tissues during CDI.**

704 Mice were treated as previously described and were euthanized 3 days after infection. The  
705 colon lamina propria (cLP), mesenteric lymph nodes (mLN) and peritoneal cavity (Per.Cav.)  
706 were collected for analysis by flow cytometry (n = 8-10/group). **(A)** Representative flow plots  
707 from d3 CDI mice infected but not treated with indomethacin depicting the gating used to identify  
708 neutrophils (Lin<sup>+</sup>Ly6G<sup>+</sup>), CD4<sup>+</sup> T cells (Lin<sup>-</sup>CD4<sup>+</sup>) and ILC group3 cells (Lin<sup>-</sup>Ly6G<sup>-</sup>CD4<sup>-</sup>RORγt<sup>+</sup>)  
709 in different organs. **(B)** Neutrophils and **(C)** CD4<sup>+</sup> T cells numbers ( $\times 10^6$ ). Quantification of the  
710 analysis of mLN and cLP CD4<sup>+</sup>RORγt<sup>+</sup> Th17 cells **(D)** and ILC type 3 (Lin<sup>-</sup>CD3ε<sup>-</sup>RORγt<sup>+</sup>) cells  
711 **(E)**. The middle line is presented as average. One-way ANOVA with Turkey's correction was  
712 used to evaluate significant differences among all groups: \* $P < 0.05$ , \*\* $P < 0.01$ , \*\*\* $P < 0.001$ .

713

714 **Fig. 3: Prostaglandin inhibition by indomethacin inhibits an intestinal protective PGE<sub>2</sub>-**  
715 **mediated response to *Clostridium difficile* and induces damage driven by innate immune**  
716 **cells.**

717 **(A)** Representative clustering showing relative mRNA expression comparing the groups that  
718 received CDI alone versus control (cefoperazone only). **(B)** Venn diagram depicting overlap in  
719 gene up- and down-regulation upon CDI or CDI+indomethacin pre-treatment compared to  
720 control mice. Size of circles is proportional to number of genes. **(C)** Volcano plot of  
721 CDI+indomethacin versus control, n=12 samples/group. Red dots in the volcano plots are  
722 significantly differently expressed genes that are either under- or overexpressed. **(D)** Summary  
723 of genes that depict the highest up- (red) and downregulation (blue) fold differences when  
724 comparing the CDI+indomethacin versus CDI alone groups. Ceca of mice belonging to mice  
725 undergoing treatment were used to obtain mRNA, generate cDNA and perform RT-PCR (n =  
726 8/group) at day 3 post-CDI. **(E)** Relative mRNA expression of intestinal markers of inflammation  
727 and protection *Reg3g* and *Muc2* **(F)** PGE<sub>2</sub> receptors EP2 and EP4 (*ptger2* and *ptger4*), and **(G)**  
728 enzymes controlling PGE<sub>2</sub> metabolism COX1, COX2, mPGES and 15-PGDH (*Ptgs1*, *Ptgs2*,  
729 *Ptges* and *Hpgd*). See also Fig. S1. \**P*<0.05 and \*\**P*<0.01 in a 1-way ANOVA.

730

731 **Fig. 4: Indomethacin treatment enhances the inflammatory milieu in ceca of mice infected**  
732 **with *C. difficile*.**

733 Mice were treated as in figures 3-4 and their ceca collected at day 3 after infection. **(A)** Protein  
734 expression levels in homogenates from individual ceca were measured by Luminex and plotted  
735 on a log-2 scale. N =7-8/group. All values are provided in pg protein/cecum protein content **(B)**.  
736 Selected pro-inflammatory cytokines and myeloid cell-recruiting chemokines plotted to depict  
737 range of variation.

738

739 **Fig. 5: Indomethacin promotes relocation of TJ-associated protein ZO1 and perturbs**  
740 **colonic epithelial cell junctions of *C. difficile*-infected mice.**

741 (A) Transmission electron micrographs showing lateral views of colonic mucosa from untreated  
742 control mice (Mock) or mice treated with the antibiotics cefoperazone alone (Abx), cefoperazone  
743 and indomethacin (Abx+Indo), cefoperazone and *C. difficile* (Abx+CD), or cefoperazone,  
744 indomethacin and *C. difficile* (Abx+Indo+CD). Arrows point to intact tight junctions (TJ). Red  
745 arrowheads point to TJ unzipping or separation. Mouse colonic tissues from the same groups  
746 above were stained for TJ-protein occludin (B) and TJ-associated protein ZO1 (C). Occludin  
747 and ZO1 stain are pseudo-colored in red. DAPI (blue) was used to stain DNA. Yellow or white  
748 arrow heads indicate cytoplasmic relocation of occludin and ZO1, respectively.

749

750 **Fig. 6: Indomethacin treatment alters the gut microbiota.**

751 (A) Non-metric multidimensional scaling (NMDS) ordination showing  $\beta$ -diversity as measured by  
752 Yue and Clayton's measure of dissimilarity ( $\theta_{vc}$ ) on day 1 post-indomethacin treatment.  
753 Significance between baseline (black) and indomethacin-treated (blue) samples measured  
754 using analysis of molecular variance (AMOVA) ( $P < 0.001$ ). (B) Differentially abundant taxa in  
755 baseline and indomethacin treated animals ranked by effect size. (C) Dynamics of recovery of  
756 differentially abundant taxa over an 11-day time course. B represents baseline microbiota pre-  
757 treatment. Sample size (N): B = 13, d1 = 14, d2 = 11, d5 = 4, d6 = 6, d11 = 6. (D) Shannon  
758 diversity index for untreated (baseline; black), cefoperazone treated (grey), or cefoperazone and  
759 indomethacin treated (red) mice. See also Fig. S2. Dynamics of (E) *Paenibacillus* and (F)  
760 *Akkermansia* relative abundance following cefoperazone (grey) and cefoperazone +  
761 indomethacin treatment (red). See also Fig. S3.

**Figure 1: Pre-treatment with Indomethacin induces *C. difficile* mortality in mice**

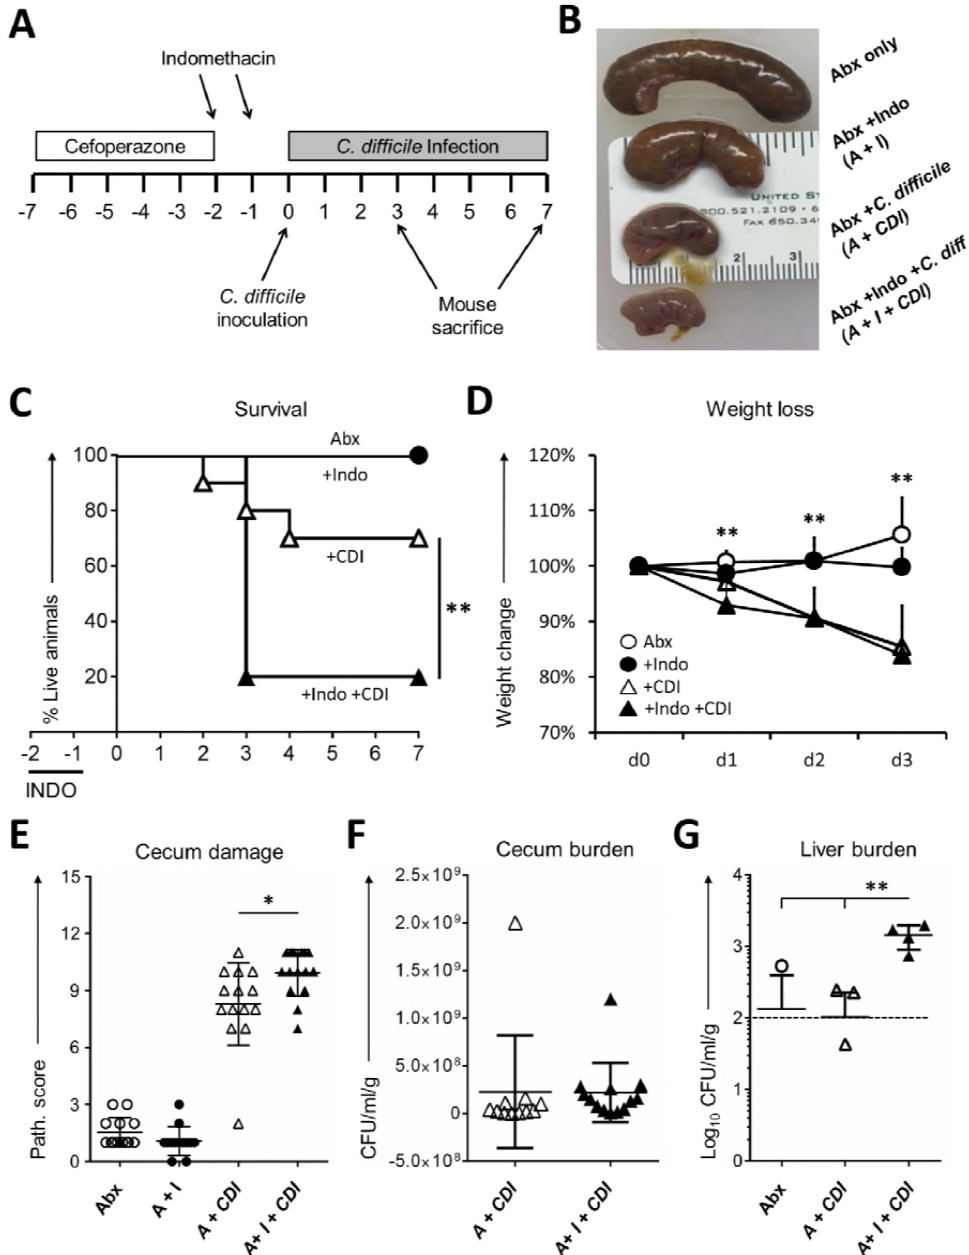



## Figure 2: Indomethacin alters neutrophils and CD4<sup>+</sup> T cells in mucosal associated tissues during *Clostridium difficile* infection

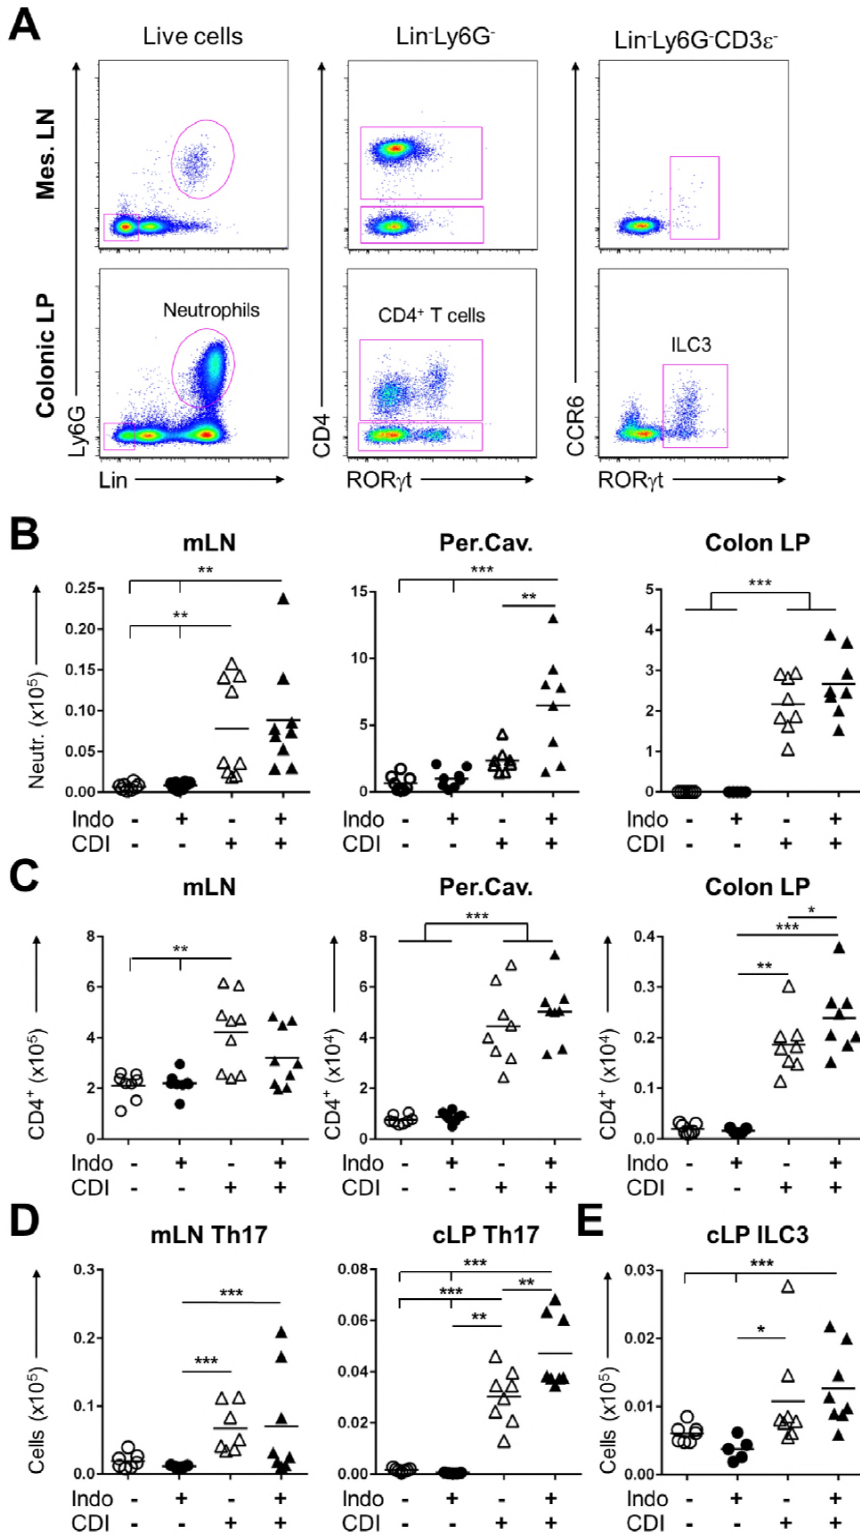

**Figure 3: Transcriptional changes induced after prostaglandin inhibition with indomethacin during *C. difficile* infection.**

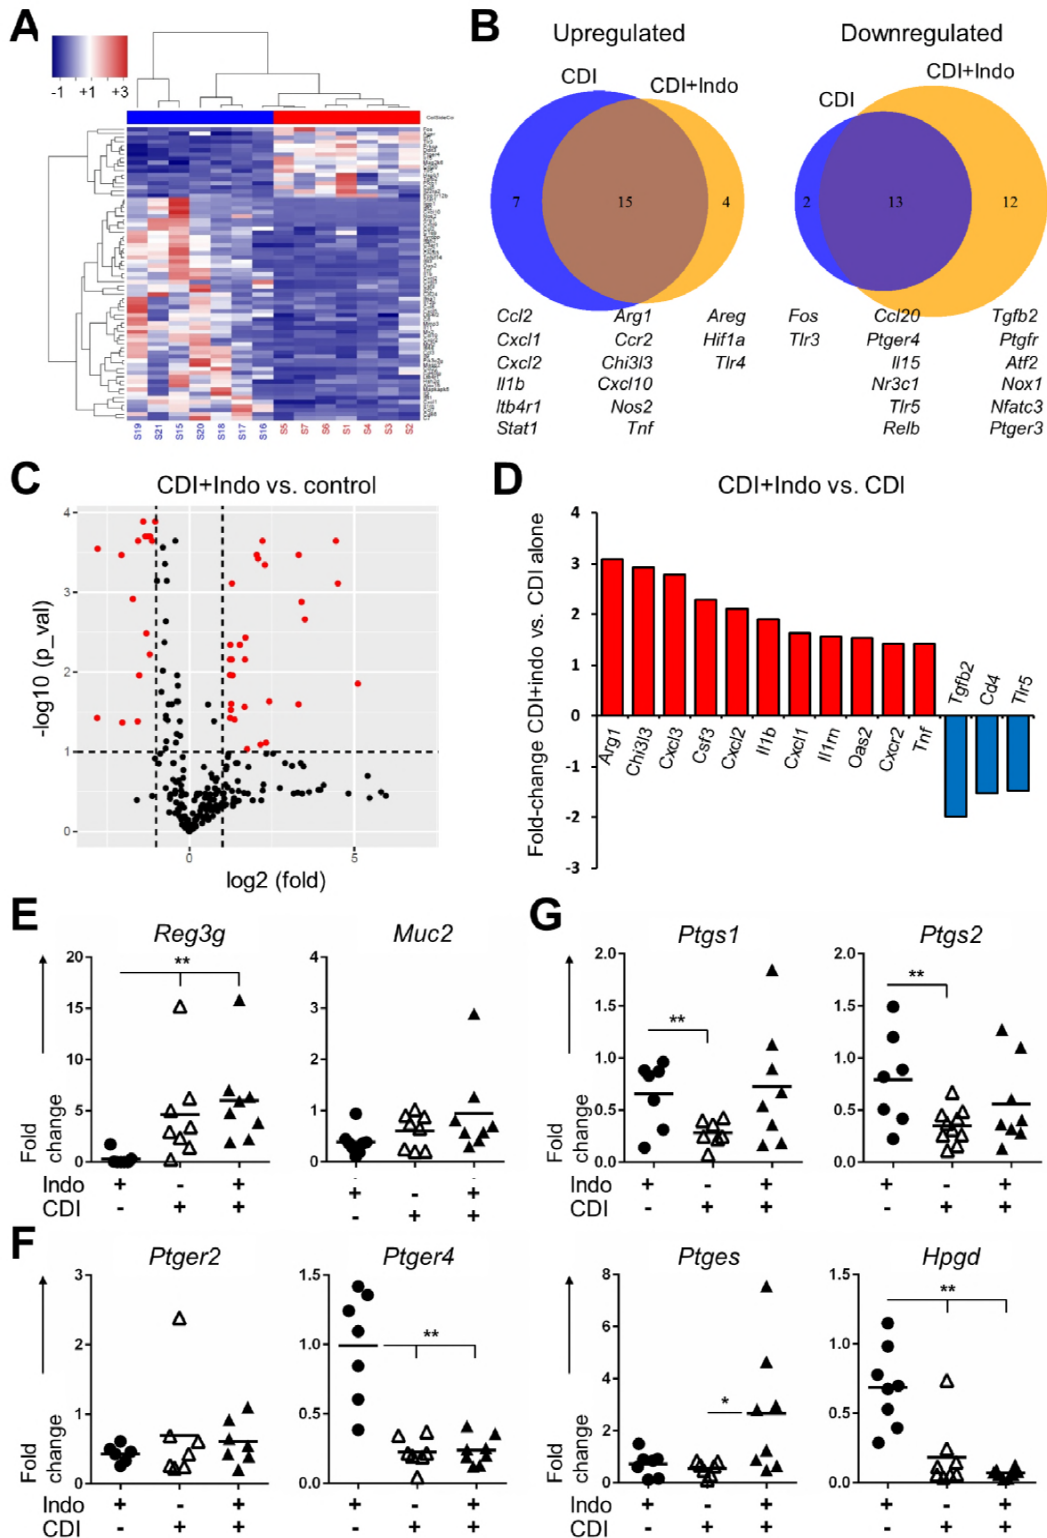

**Figure 4: Indomethacin alters the inflammatory milieu and innate immune cell recruiter cytokines and chemokines in ceca of mice infected with *C. difficile***

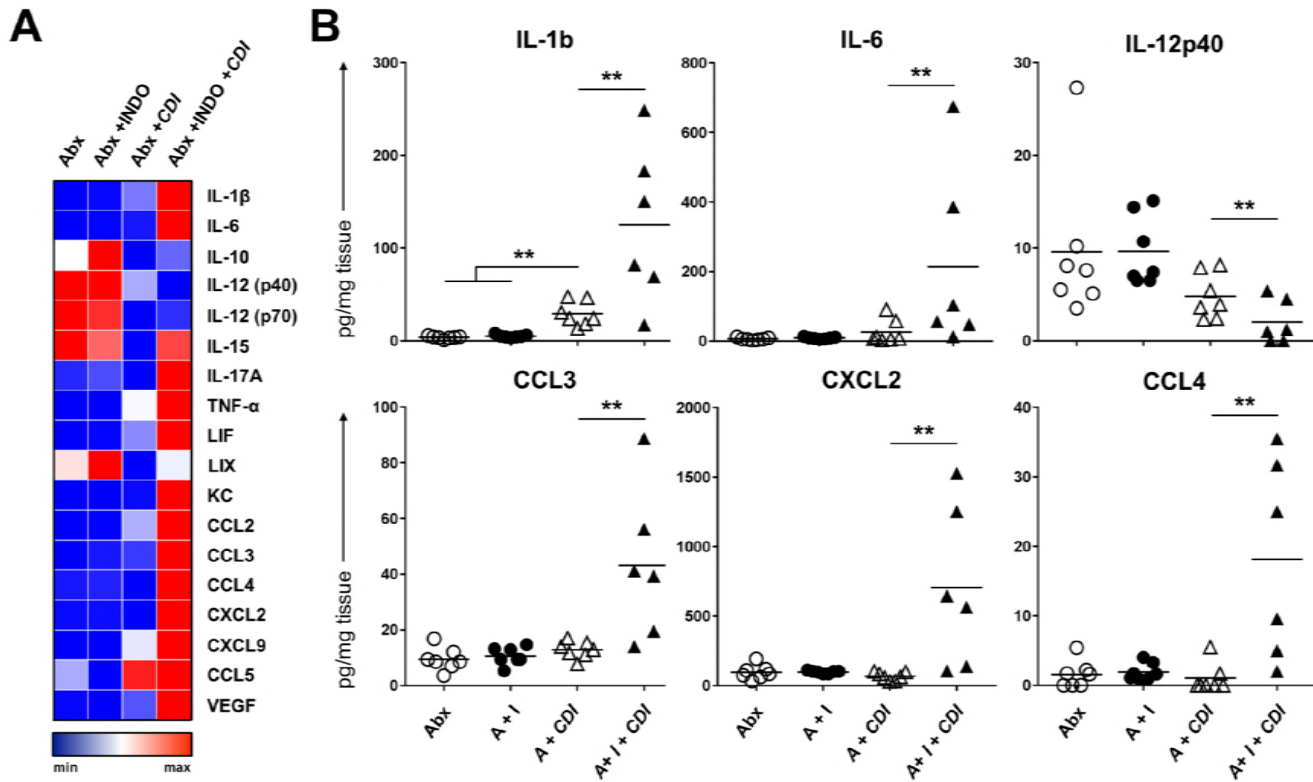

## Figure 5: Indomethacin promotes relocation of TJ-associated protein ZO1 and perturbs colonic epithelial cell junctions of *C. difficile*-infected mice

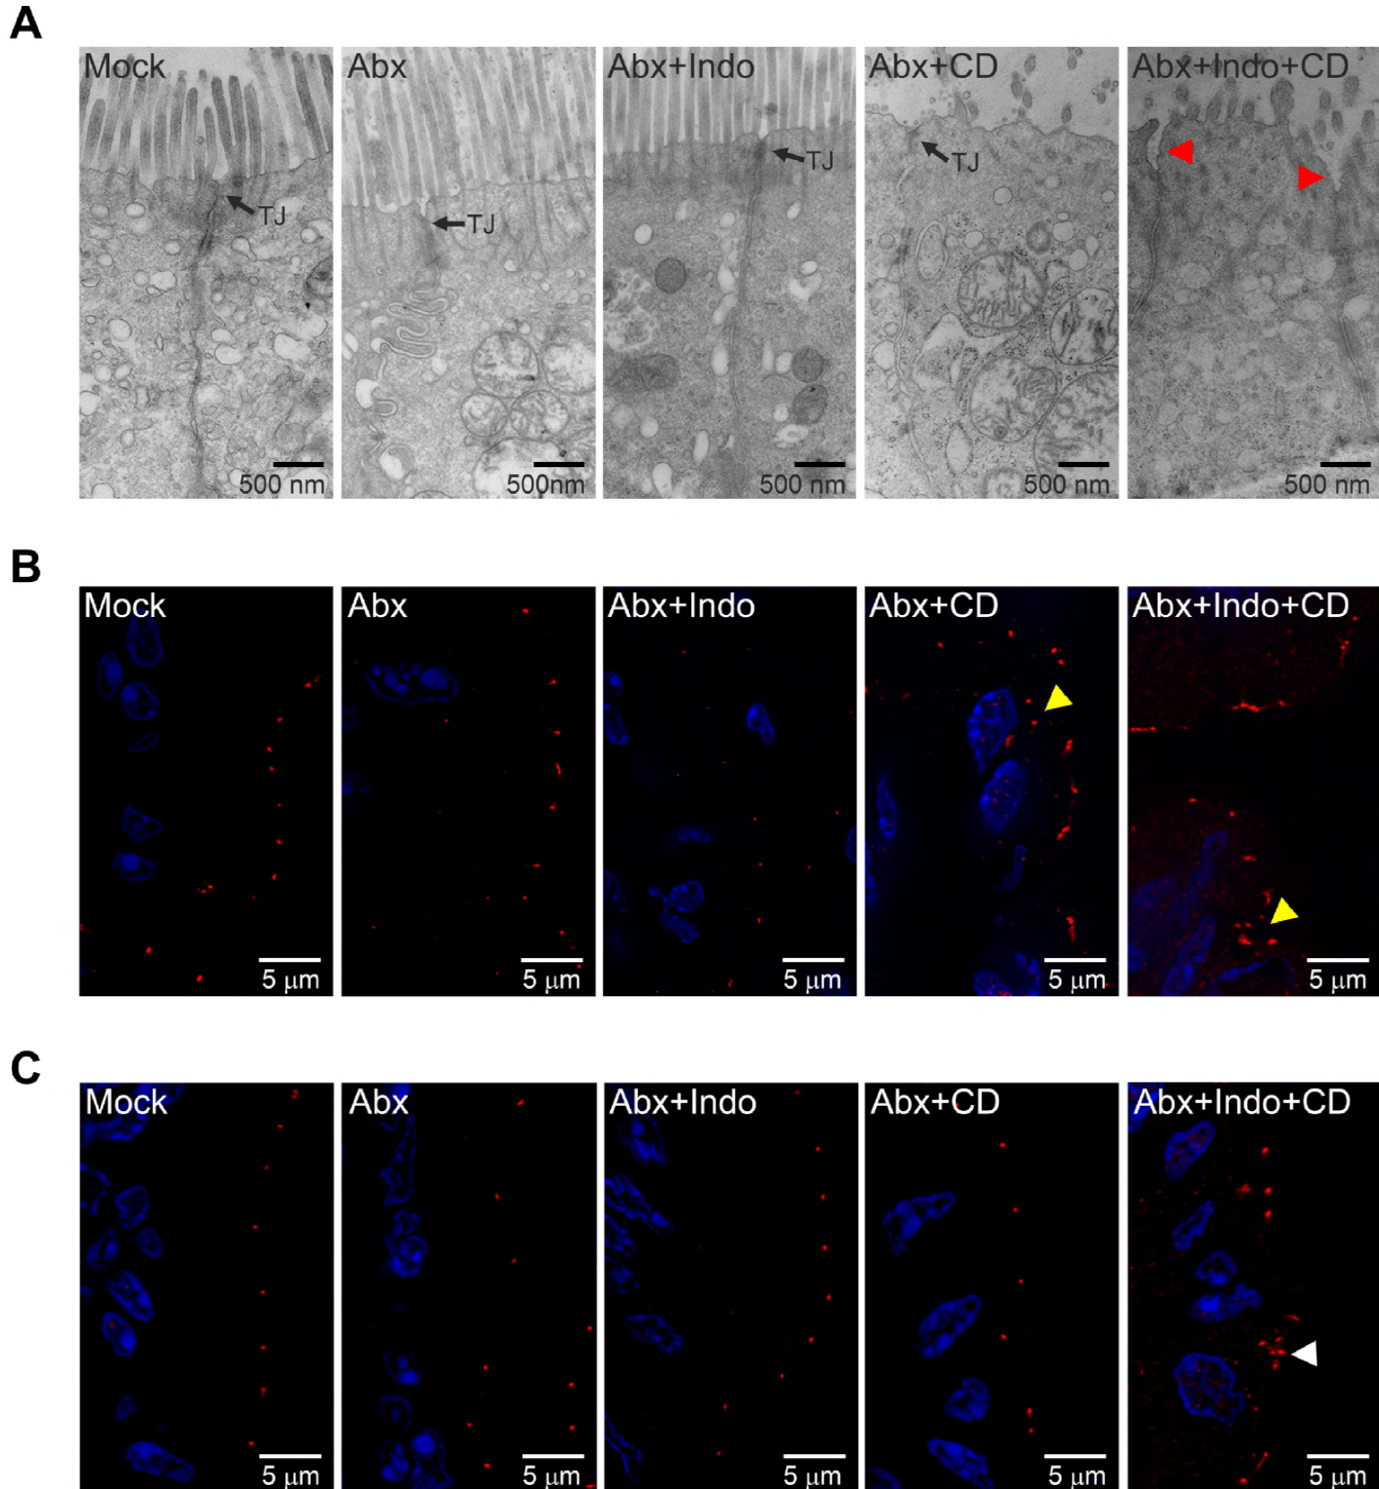

## Figure 6: Indomethacin treatment alters the gut microbiota

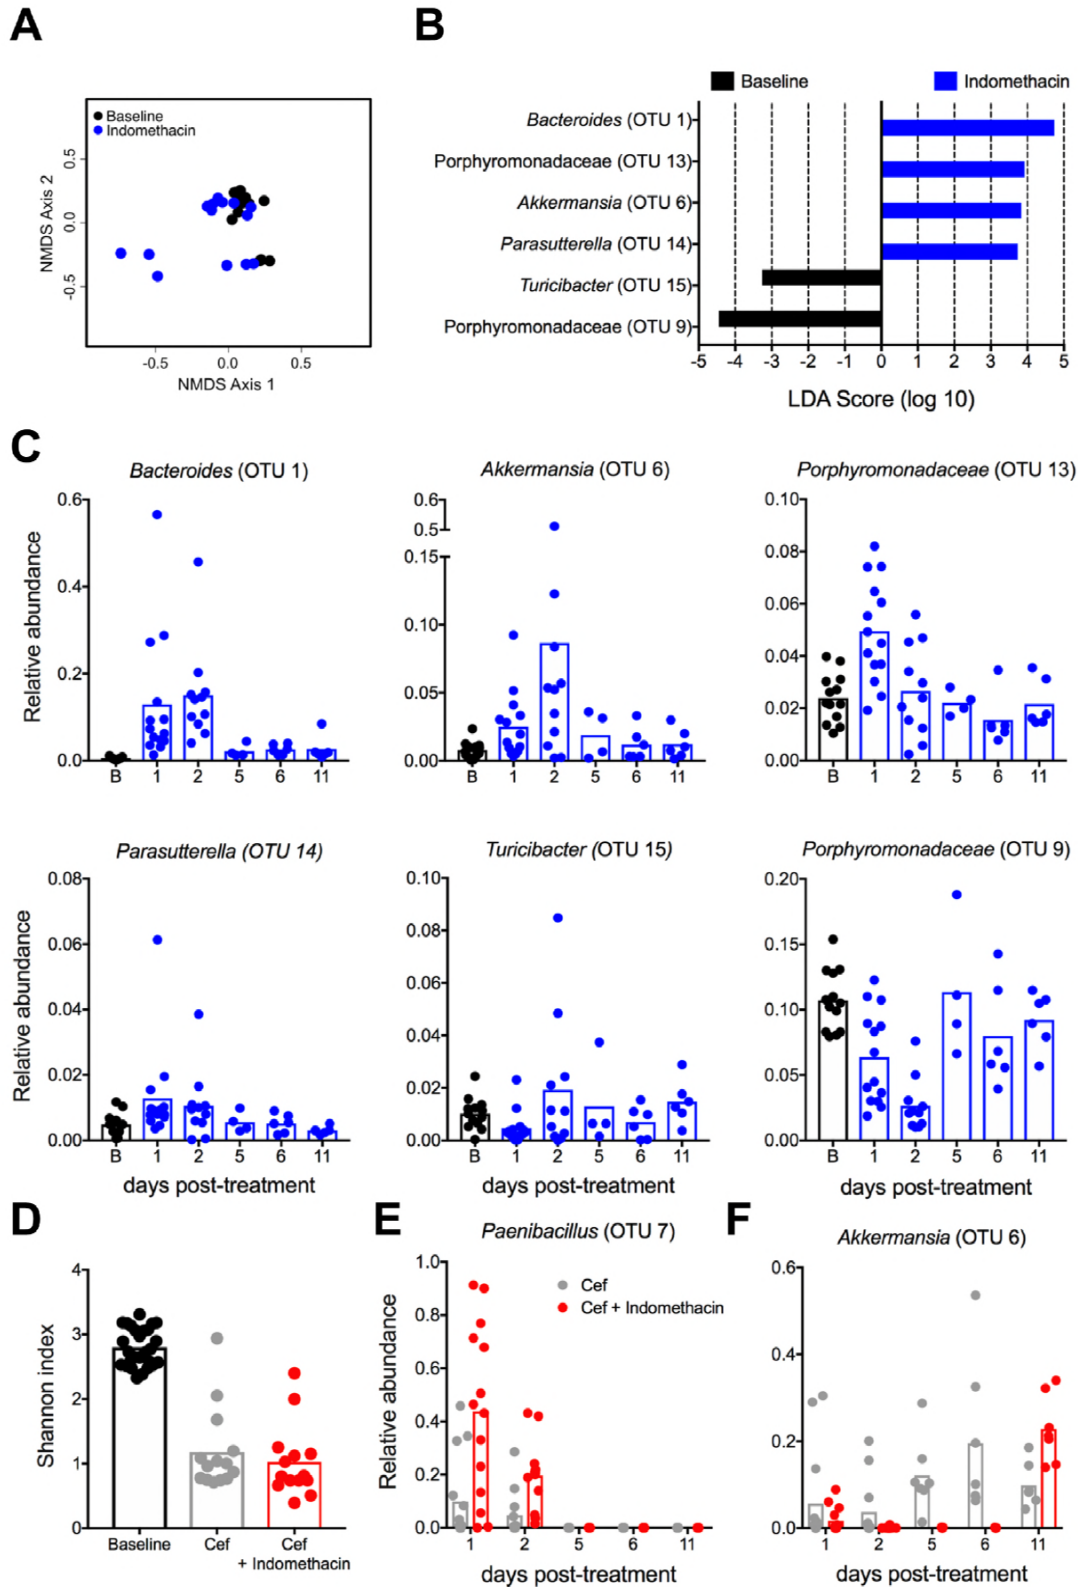

Source: https://www.biorxiv.org/content/10.1101/391607v1.full.pdf
